1  
2  
3  
4  
5  
6  
7  
8  
9  
10  
11  
12  
13  
14  
15  
16  
17  
18  
19  
20  
21  
22  
23  
24  
25  
26  
27

## “Mitigating Cancer Pain: What else Matters?”—A Qualitative Study into the Needs and Concerns of Cancer Patients in Sri Lanka

Edirisinghe NP<sup>1,2</sup>, Makuloluwa PTR<sup>3</sup>, Amarasekara AATD<sup>4</sup>, Goonewardena CSE<sup>5,6</sup>

<sup>1</sup> Department of Fundamental Nursing, Faculty of Nursing, University of Colombo, Sri Lanka  
[niroshae@fnd.cmb.ac.lk](mailto:niroshae@fnd.cmb.ac.lk)

<sup>2</sup> Faculty of Graduates Studies, University of Sri Jayewardenepura, Sri Lanka

<sup>3</sup>Department of Clinical Sciences, Faculty of Medicine, General Sir John Kotelawala Defence University, Sri Lanka, [makuloluwaptr@kdu.ac.lk](mailto:makuloluwaptr@kdu.ac.lk)

<sup>4</sup>Department of Nursing and Midwifery, Faculty of Allied Health Sciences, University of Sri Jayewardenepura, Sri Lanka, [thamara@sjp.ac.lk](mailto:thamara@sjp.ac.lk)

<sup>5</sup>Department of Community Medicine, Cancer Research Center, Faculty of Medical Sciences, University of Sri Jayewardenepura, Sri Lanka, [sampatha@sjp.ac.lk](mailto:sampatha@sjp.ac.lk)

<sup>6</sup>Cancer Research Center, Faculty of Medical Sciences, University of Sri Jayewardenepura, Sri Lanka

**Corresponding Author:** Dr. Nirosha Priyadarshani Edirisinghe, [keenirossha@yahoo.com](mailto:keenirossha@yahoo.com), [+94718435907](tel:+94718435907)

PTRM, AATDA, and CSEG contributed substantially to the work's concept and design, revised the article, and approved the version to be published. NPE conducted the research study, analyzed and interpreted the data, and drafted the article. All authors have read and approved the final manuscript and agreed to be accountable for all aspects of the work.

**NOTE:** This preprint reports new research that has not been certified by peer review and should not be used to guide clinical practice.

## 28 **Abstract**

29 **Objectives:** The overall experience of cancer pain reflects patients' needs and concerns.  
30 Therefore, a thorough understanding of the patient's needs and concerns is crucial to  
31 implementing satisfactory pain outcomes. This study aims to explore the needs and concerns  
32 of patients with cancer pain in Sri Lanka.

33 **Methods:** This study employed a descriptive qualitative approach among purposively selected  
34 patients with cancer and registered at the pain management unit. Patients eighteen years older  
35 with cancer-related pain were recruited. Noncancerous pain and those with psychological  
36 disorders, and brain metastases were excluded. Twenty-one semi-structured interviews were  
37 conducted until data saturation using a semi-structured interview guide, each lasting 30-60  
38 minutes. Data were analyzed by Graneheim and Lundman's content analysis method.

39 **Results:** The study primarily involved participants aged 51-60 Sinhalese Buddhists. It  
40 highlighted two main themes: 'Changes in normal lifestyle' and 'Needs and expectations'. The  
41 'Changes in normal lifestyle' theme included subthemes like 'Functional limitations',  
42 'Emotional reactions', 'altered interpersonal relationships', and 'Socio-financial problems'. The  
43 'Needs and expectations' theme covered desires for a 'Pain-free life', a return to a 'Normal  
44 lifestyle', and the 'Need for a caregiver'. The findings emphasize that the most significant issue  
45 for cancer patients is the disruption to their normal lifestyle due to various challenges, while  
46 their primary need is to live without pain.

47 **Conclusions:** 'Life without pain' is a cancer sufferer's greatest need while 'changes in normal  
48 lifestyle' owing to bio-psycho-social-spiritual problems is their primary concern.

49 **Keywords:** Cancer pain, needs, problems, pain free-life, pain concerns

50

51

52

## 53 **1. Introduction**

54 Pain is a major cause of cancer-related suffering. Therefore, a thorough understanding of  
55 patients' needs and concerns is crucial to implementing satisfactory pain outcomes. According  
56 to the World Health Organization (WHO), cancer killed almost 10 million people in 2020, or  
57 one in six [1]. According to GLOBOCAN 2020, 29,604 new cases were reported in Sri Lanka  
58 in 2020 [2]. Pain affects 66% of oncology patients [3] and affects all aspects of life. Cancer  
59 pain significantly impacts patients' emotions, cognitive performance, daily activities, and  
60 family and social interactions.

61 Cancer patients may live longer due to early detection and advancements in treatment  
62 modalities [4]. On the other hand, patients are subjected to uncomfortable diagnostic and  
63 therapeutic interventions, increasing the risk of experiencing pain. Untreated cancer pain is  
64 prevalent in Asia, at 59% compared to 40% in Europe and 39% in the USA, despite advances  
65 in cancer therapy and increasing access to supportive care [5]. Pain is still widely  
66 misunderstood, under-reported, and frequently undertreated, resulting in significant distress for  
67 the patient and his or her close relatives.

68 Cancer-related pain can occur before diagnosis, during treatment, and at the end. Pain is  
69 common and may persist, return, or change. Long-term disease and therapeutic impacts affect  
70 even cured individuals. Advanced cancer patients may mistake increased pain for disease  
71 progression, creating silent fear, grief, and lower quality of life. Patients, especially cancer  
72 survivors, may also need unnecessary hospitalizations, outpatient visits, or long-term  
73 psychosocial treatment due to untreated or poorly controlled pain. Studies show that cancer  
74 pain is poorly controlled and that effective pain medicines are not used for optimal pain relief,  
75 despite the well-documented causes of poor pain therapy [6]

76 Insufficient pain assessment is the most common mistake in pain management, even though  
77 pain can be detected through self-reporting, physiological testing, and behavioral observation

78 [7]. Cancer pain often causes biopsychosocial issues; hence many studies stress holistic care  
79 [8]. Cancer patients' participation in research helps them understand cancer pain. Their  
80 thoughts, experiences, and ideas emphasize life with cancer pain.

81 According to studies conducted in Brazil, China, Taiwan, Korea, and Turkey, pain has adverse  
82 effects on appetite, sleep, fatigue, daily activity, general appearance, mood, family support,  
83 financial status, walking ability, relationships with others, enjoyment of life, nutrition,  
84 mobility, emotional status, and overall QoL of patients [9-13]. In a study among 5084 adult  
85 patients, 69% reported pain-related difficulties with everyday activities [14]. Patients with pain  
86 have distinct demands, such as pain alleviation, reassurance from their healthcare provider, an  
87 acceptable degree of functioning, and the capacity to live a normal lifestyle. However, it is  
88 important to realize that everyone reacts to pain differently depending on their personality, pain  
89 threshold, expectations, and requirements. Therefore, pain management must also be  
90 individualized [15]. Further, everyone needs to find solutions to the problems mentioned.

91 The primary goals of a cancer-care system are to reduce cancer-related deaths and improve  
92 survivors' quality of life (QoL). The only approach to enhance these patients' QoL is to  
93 acknowledge the pain and its impact on their ability to live a pleasant and quality life. Sri  
94 Lanka, a Low Middle-Income Country, has inadequate facilities for recognizing pain and its  
95 associated phenomena, and any improvement in these facilities can reduce the burden of cancer  
96 pain on people, families, and society. Cancer pain is a widespread and debilitating feature of  
97 the oncology journey, affecting the physical, emotional, and social well-being of patients.

98 Although there have been improvements in medical therapies, there is still a lack of complete  
99 knowledge of the essential needs and concerns associated with cancer pain.

100 While the importance of addressing cancer pain has been widely recognized, there is still a lack  
101 of complete understanding of patients' needs and concerns, particularly in resource-constrained  
102 countries. Sri Lanka, as a low-middle-income country, confronts difficulty in successfully  
103 detecting and controlling cancer pain, emphasizing the importance of study in this field. The

104 study aims to promote understanding of cancer pain by shedding light on the substantial needs  
105 and issues related to it in Sri Lanka.

106 In light of these factors, it is vital to emphasize the significance of performing this study with  
107 a qualitative method. Qualitative research approaches offer unique insights into patients'  
108 experiences, viewpoints, and unmet needs, providing a rich understanding of the complexity  
109 surrounding cancer pain. By incorporating a qualitative approach, this study intends to capture  
110 the intricacies of patients' experiences with cancer pain in Sri Lanka, ultimately driving the  
111 creation of more effective and patient-centered interventions.

## 112 **2. Methods**

### 113 **2.1 Study design**

114 A qualitative descriptive study was conducted approach to delve into the lived experiences of  
115 individual needs and major concerns of patients with cancer pain in Sri Lanka. This study  
116 adopts a constructivist perspective, acknowledging the subjective nature of cancer experiencing  
117 pain and seeking to explain and comprehend the many interpretations attributed to these  
118 experiences by individuals. Data was collected from November 2018 to April 2019.

### 119 **2.2 Study setting and participants**

120 The study participants included patients aged 18 and older with cancer-related pain (pain score  
121 of three or more on a Numerical Rating Scale) who attended Apeksha Hospital's Pain  
122 Management Unit (PMU) in Maharagama. All participants understood and spoke Sinhala and  
123 gave informed written consent. Patients with non-cancerous pain, frail/mentally unfit, or  
124 disoriented with evidence of brain metastases were excluded. Purposive sampling selected  
125 patients from various age groups, sexes, educational levels, cancer types, and treatment  
126 methods.

## 127 **2.3 Study instruments**

128 The interviews followed a semi-structured interview guide. The guide's concepts and question  
129 areas were determined based on a comprehensive literature review and subsequently revised  
130 by subject specialists. The semi-structured guide was pre-tested on five in-patients with cancer  
131 pain. This helped identify difficult probing questions and determine if the interviewer guide  
132 received the desired range of responses. The timing of the interviews was determined, and  
133 questions about transcription were also clarified. The guide was revised after the pre-test.

## 134 **2.4 Data collection**

135 The principal investigator (PI), a registered nurse, and an experienced qualitative researcher  
136 conducted semi-structured interviews (n=21) until theoretical data saturation was attained with  
137 the use of an interview guide. The interviewer introduced herself and described the purpose of  
138 the interview. The informant was assured that the information would be treated with  
139 confidentiality and that his/her name would never be identified in any notes taken and written  
140 reports. It was also stressed that he/she was allowed to express any opinion and that no  
141 judgment would be made. Care was taken to avoid using the word 'cancer' or any other word  
142 with a similar meaning to minimize the distress for the informant. The phrase 'the disease  
143 treated at this hospital' was used instead. The informant acknowledged that clinical staff would  
144 not be informed until indicated. In such cases, the informant's consent was sought. Informed  
145 written consent, including recording the interview, was obtained from each participant before  
146 the interview.

147 The interviews were conducted in a quiet room at the pain clinic or in a separate area in the  
148 ward where the participants felt comfortable, and their privacy was ensured. Nonverbal cues  
149 were noted. Throughout the interview, the interviewer was open and nonjudgmental. Finally,

150 the interviewer summarized the conversation and assessed the respondent's validity. The  
151 interviews lasted 30-60 minutes.

## 152 **2.5 Data analysis**

153 Qualitative data were analyzed using content analysis described by Granehiem and Lundman  
154 [16] and reported according to the checklist for qualitative studies Standards for reporting  
155 qualitative research (SRQR). Data collection and analysis were simultaneous processes.  
156 Transcripts were read numerous times to comprehend and establish basic meaning categories  
157 and codes. After familiarizing myself with the data, the initial codes were created. The  
158 transcripts were generated codes, subcategories, categories, and themes. Subcategories and

## 159 **2.6 Trustworthiness**

160 The data's reliability was assessed using Guba and Lincoln's guidelines [17]. Internal validity  
161 was promptly checked on transcripts. The PI built rapport with study participants throughout  
162 data collection. To assure comparability, two participants received transcripts and codes  
163 for member checks. The units of meaning, codes, subcategories, categories, and themes were  
164 accepted by external qualitative research experts, who provided comments that were integrated  
165 into the final analysis. Meaning units and initial codes were derived from two external reviewer  
166 interviews. The selected interviews, codes, and categories were also shared with two non-study  
167 cancer pain patients, who both agreed that the codes accurately characterized their experiences.

## 168 **2.7 Ethical considerations**

169 Ethical approval was granted for this study by the Ethics Review Committee (ERC), Faculty  
170 of Medical Sciences, University of Sri Jayewardenepura, Sri Lanka (App No: 32/17).  
171 Comprehensive details about the study's aims, procedures, and significance were shared with

172 the participants before gathering data. All participants gave their informed consent,  
173 highlighting the voluntary nature of their involvement, their freedom to exit the study at any  
174 point without any consequences, and the guarantee that their information would remain  
175 confidential. Rigorous precautions were taken to maintain participant privacy and anonymity.  
176 Personal or identifiable information obtained during the research was treated with the utmost  
177 confidentiality, securely stored, and made available only to the investigators involved in the  
178 study.

### 179 **3. Results**

180 Among the participants (n=21), the majority were Sinhalese and Buddhists in the age group of  
181 51-60 years. Twelve (57.1%) were females, and 16 (76.2%) were married. Most participants  
182 had a monthly salary of less than LKR.5000, and roughly 47% had completed Grades 6-11.  
183 Among the individuals, 57% reported pain for three months or more, and 52% had cancer for  
184 less than a year (Table 1). During data analysis, two primary themes emerged about cancer  
185 patients' needs and concerns. Each theme contained sub-themes with meaning units.

186 **Table 1: Demographic characteristics of the study participants (n=21)**

| Socio-demographic characteristics |                        | Frequency | Percentage % |
|-----------------------------------|------------------------|-----------|--------------|
| Age (in years)                    | 18-30                  | 2         | 9.5          |
|                                   | 31-40                  | 3         | 14.3         |
|                                   | 41-50                  | 5         | 23.8         |
|                                   | 51-60                  | 7         | 33.3         |
|                                   | 61-70                  | 4         | 19.0         |
| Ethnicity                         | Sinhala                | 18        | 85.7         |
|                                   | Tamil                  | 2         | 9.5          |
|                                   | Muslim                 | 1         | 4.8          |
| Religion                          | Buddhism               | 14        | 66.7         |
|                                   | Catholic /Christianity | 4         | 19.0         |
|                                   | Hindu                  | 2         | 9.5          |



|                                |                     |    |      |
|--------------------------------|---------------------|----|------|
|                                | Islam               | 1  | 4.8  |
| Gender                         | Female              | 12 | 57.1 |
|                                | Male                | 9  | 42.9 |
| Current Marital status         | Married             | 16 | 76.2 |
|                                | Unmarried           | 2  | 9.5  |
|                                | Divorced/ separated | 1  | 4.8  |
|                                | Widow               | 2  | 9.5  |
| Highest level of education     | Not been to school  | 0  | 0    |
|                                | Grade 1-5           | 4  | 19.0 |
|                                | Grade 6-11          | 10 | 47.6 |
|                                | Grade 12-13         | 6  | 28.6 |
|                                | Graduate            | 1  | 4.8  |
|                                | Post graduate       | 0  | 0    |
| Monthly income (Rs)            | < 5000              | 18 | 85.7 |
|                                | 5001-10000          | 0  | 0    |
|                                | 10001-15000         | 0  | 0    |
|                                | 15001-20000         | 0  | 0    |
|                                | >20000              | 3  | 14.3 |
| Type of family                 | Nuclear             | 11 | 52.4 |
|                                | Extended            | 10 | 47.6 |
| Availability of helper         | Yes                 | 15 | 71.4 |
|                                | No                  | 6  | 28.6 |
| Family responsibilities        | Yes                 | 13 | 61.9 |
|                                | No                  | 8  | 38.1 |
| Time since diagnosis of cancer | < 1 year            | 11 | 52.4 |
|                                | > 1 year            | 10 | 47.6 |
| Type of Cancer                 | Uro-genital         | 4  | 19.0 |
|                                | Gastro-intestinal   | 6  | 28.6 |
|                                | Breast              | 4  | 19.0 |
|                                | Other               | 5  | 23.8 |
|                                | Lung                | 2  | 9.5  |
| Duration of cancer pain        | 1-3 months          | 9  | 42.9 |
|                                | >3 months           | 12 | 57.1 |

|                                |     |    |      |
|--------------------------------|-----|----|------|
| Presence of co-morbid diseases | Yes | 6  | 28.6 |
|                                | No  | 15 | 71.4 |

187

188

### 189 **3.1 Theme 1: Changing normal lifestyle.**

190 Advanced cancer patients' daily lives are affected by pain. The subthemes were "functional  
 191 limitations," "emotional reactions," "altered interpersonal relationships," and "socio-financial  
 192 problems." Cancer-related pain affected all respondents. Physical, social, economic, and  
 193 psychological distress were noted by patients. They regretted their pain, which left them  
 194 depressed and hopeless most days. Table 2 lists the meaning units, codes, and categories for  
 195 Theme 1: Changing normal lifestyle.

196 **Table 2. Theme 1: Changing normal lifestyle**

| Meaning units                                                                         | Condensed meaning unit                                                                                            | Codes                                 | Categories                    | Themes                           |
|---------------------------------------------------------------------------------------|-------------------------------------------------------------------------------------------------------------------|---------------------------------------|-------------------------------|----------------------------------|
| <i>"I cannot do housework, and I did all the housework. They are all ruined now."</i> | Patients could not attend to their self-care activities/ other general work; pain interferes with all activities. | -Unable to do normal daily activities | <b>Functional limitations</b> | <b>Changing normal lifestyle</b> |
| <i>"I cannot do anything when the pain comes."</i>                                    | Pain causes many discomforts (e.g., swallowing, walking)                                                          | -Physical discomforts                 |                               |                                  |
| <i>"I cannot sleep when I have pain, which interferes with sleep."</i>                | Pain interferes with sleep, interrupts sleep, or reduced sleep quality                                            | -Disturbed sleep                      |                               |                                  |
| <i>"I cannot cook now. I do not eat the way I want to..."</i>                         | Patients were unable to do their daily activities as they wish                                                    | -Limited freedom of life              | <b>Emotional reactions</b>    |                                  |

|                                                                                                             |                                                                                                               |                                           |                                                   |  |
|-------------------------------------------------------------------------------------------------------------|---------------------------------------------------------------------------------------------------------------|-------------------------------------------|---------------------------------------------------|--|
| <p><i>"I cry most of the time. I tell the people who talk with me that this is my grief....."</i></p>       | <p>They feel sad due to the non-fulfillment of their hopes or expectations due to pain</p>                    | <p>-Feeling disappointed</p>              |                                                   |  |
| <p><i>"I jumped off the roof once. I cannot bear the pain..... What to do when the pain increases?"</i></p> | <p>Having thoughts of dying as it is better than living with unbearable pain. Insecurity with pain.</p>       | <p>Catastrophizing thoughts</p>           |                                                   |  |
| <p><i>"I forget what I need to do.... I do not feel like doing anything.."</i></p>                          | <p>Patients were unable to focus on a task or easily distracted due to pain</p>                               | <p>-Poor concentration</p>                |                                                   |  |
| <p><i>"I feel angry when someone talks when I am in pain."</i></p>                                          | <p>Pain makes them feel annoyed or agitated easily.</p>                                                       | <p>- irritability</p>                     |                                                   |  |
| <p><i>"Now the pain really got worse and worse. It looks like I cannot wait any longer."</i></p>            | <p>Pain is becoming unbearable and worrying. The feeling of uncertainty and fear about the future</p>         | <p>- anxiety</p>                          |                                                   |  |
| <p><i>"My life has changed more than ever.... What was done before cannot be done now."</i></p>             | <p>The patient was unable to attend to his/her previous roles in the family/society/workplace due to pain</p> | <p>-altered personality (role)</p>        |                                                   |  |
| <p><i>"Social relationships and social works have almost stopped."</i></p>                                  | <p>Confined to the home as mobility aggravates the pain</p>                                                   | <p>- Interrupted social relationships</p> | <p><b>Altered interpersonal relationships</b></p> |  |

|                                                                                                            |                                                                                                                                        |                                                         |                                            |  |
|------------------------------------------------------------------------------------------------------------|----------------------------------------------------------------------------------------------------------------------------------------|---------------------------------------------------------|--------------------------------------------|--|
| <p><i>"I cannot do that (cooking) for my husband. I cannot do anything for him. I feel sad...."</i></p>    | <p>Feeling of dejection with the inability to complete own role in the family</p>                                                      | <p>- Interrupted family/marital relationships</p>       |                                            |  |
| <p><i>"I do not have anybody to be with me. I have to pay Rs. 2000 per day to keep the bystander."</i></p> | <p>Lack of family and social support. Additional expenses for treatments, traveling, investigations, and caregivers. Being in debt</p> | <p>Lack of family support<br/>Increased health cost</p> | <p><b>Socio-Financial difficulties</b></p> |  |
| <p><i>"Driving is my job. I cannot do it now. The job has now stopped."</i></p>                            | <p>Inability to do the job due to pain</p>                                                                                             | <p>Loss of income</p>                                   |                                            |  |

197

### 198 3.1.1 Functional limitations

199 According to participants, cancer pain had a negative impact on their everyday activities. As  
 200 their condition advanced, they could not adjust their lifestyle to obtain better pain relief. Almost  
 201 every patient stated that cancer pain had a detrimental impact on their functional level, daily  
 202 activities, and sleep. They were unable to eat, walk, or cook. The pain made sitting, standing,  
 203 or rolling incredibly uncomfortable.

204 *"I cannot do housework, and I cannot sleep; I did all the housework. They are all*  
 205 *ruined now". (P-01)*

206 It was said that the lack of trigger and energy made mobility difficult. Fatigue led to a sedentary  
 207 lifestyle. For example, numerous patients reported losing interest in or taking longer to  
 208 complete chores in general.

209 *"Because of this pain, I cannot do anything... I cannot do anything when the pain comes.*  
210 *I get bored easily of everything." (P-14)*

211 Sleep deprivation is another significant issue connected with cancer pain. Cancer pain results  
212 in poor quality sleep that is shorter in duration and interrupted frequently.

213 *"I cannot sleep when I have pain, and it interferes with sleep. I fall asleep when the*  
214 *pain goes away, and it may be daytime or night... If there is pain, I will never fall*  
215 *asleep..." (P-07)*

### 216 **3.1.2 Emotional reactions**

217 Almost all reported emotional alterations. Tearfulness, depression, anxiety, anger, and  
218 irritation were feelings not experienced previously. Many psychological issues were directly  
219 or indirectly linked to pain and disease. Pain has made some feel unhappy, scared, helpless,  
220 and hopeless.

221 *"I cannot do anything now... Because of this leg [showing her leg]. I am in a very*  
222 *miserable situation now.... Worried .... I am very sad.... (Crying).... I cry most of the*  
223 *time..." (P-01)*

224 Some individuals stated they could not concentrate and forget easily when the pain arises.

225 *"Sometimes, I get irritated with pain. Other than running here and there, I forget what*  
226 *I need to do.... I do not feel like doing anything". (P-15)*

227 Most individuals feel angry as the pain rises. They do not like to talk with anybody when the  
228 pain increases, and they are worried about their life thinking about how it was past and present.

229 *"I feel angry when someone talks when I am in pain. I have a concussion, and I cannot*  
230 *sleep. Annoying, no consolation. It is heartbreaking to see how I lived for so long and*  
231 *living now. How it was then, how it is now ..." (P-18)*

232 Patients in this study reported fatalistic thoughts that there was nothing they could do to escape  
233 cancer pain or death or that they would prefer to die to be free of pain. They tend to cry and  
234 think repeatedly, and some have had suicidal ideations.

235 *"Now the pain really got worse and worse. It looks like I cannot wait any longer. Yes, I*  
236 *jumped off the roof once. I cannot bear the pain... That is so hard." (P-02)*

### 237 **3.1.3 Interrupted interpersonal and social relationships.**

238 The pain has affected most participants' relationships with spouses, relatives, and outsiders.  
239 Some respondents valued the aid of friends, family, neighbors, and the workplace. Many  
240 described how important it was to maintain cherished relationships and how difficult it was  
241 when pain interfered, whether due to the need for physical assistance or seeing their carers  
242 distressed:

243 *"There are times when I get angry. I only see her [wife] tears when I scold her. I feel*  
244 *so sorry for her ... so there is nothing to do, so much pain ... then I say sorry. However,*  
245 *although I apologize, she might have been hurt a lot. We have been together with our*  
246 *family for 25 years now. She knows my helplessness. The heart feels that inner pain. So*  
247 *such incidents happen, I apologize to God, 'God forgives me, I have done something*  
248 *like this from my mouth to my wife.'" (P-16)*

249 Some patients fear their sickness. Pain prevents them from visiting anyone. Due to their  
250 discomfort, some informants feared socializing. Below are a few statements by them.

251 *"I do not even want anybody to visit me. If I cannot treat or care and not talk to them..."*

252 *"I do not like to go to any social events, temple, or wedding ceremonies since I cannot*  
253 *be bemoaning there. I feel my sight might be an unlucky sign. So, if I cannot be there*  
254 *without a mess, I do not want to go to such places...." (P-18)*

### 255 3.1.4 Financial difficulties

256 Pain has affected the lives of most of the participants. Most respondents listed money issues as  
257 a major source of concern. The most expensive charges were transportation to the hospital,  
258 medicines, and investigations. Religious activities and alternative remedies were also high  
259 costs. The issues of high expenses were exaggerated by the poor income generation resulting  
260 from the disease, which led to borrowing money.

261 Sometimes family members have to leave work to care for their loved ones. If the victim is the  
262 family's breadwinner, they faced too many problems.

263 *"Driving is my job. I cannot do it now. If there is no pain, I can do my job, which is*  
264 *unbearable. I always feel pain. The only problem is the pain" (P-02)*

265 Most are incapacitated and need someone to care for them. In the absence of a family member,  
266 it was required to hire paid caregivers.

267 *"We do not have anybody to be with me [as a caregiver at the hospital]. I have to pay*  
268 *Rs. 2000 (2000LKR) per day to keep a caregiver. From where can I get so much*  
269 *money...? Rs10,000 (10000LKR) if I stay for five days.... [silence for a while]... My*  
270 *younger daughter was about to marry this year. The boy who was about to marry my*  
271 *daughter stayed with me at the hospital for a month, and finally, he lost his job..." (P-*  
272 *09)*

273 A woman with lung cancer from a low-income family revealed how she helped her family earn  
274 money while she was healthy. However, she is worried because she is not contributing now.

275 *"I used to sew carpets. I cannot do it now; Earlier, I was earning something too.*  
276 *However, now I have lost that too. It costs a lot of money for kids to learn. Now my*  
277 *husband has to do everything. So there are many money matters at home". (P-17)*

### 278 3.2 Theme 2: Expectations and needs

279 Most participants are unsatisfied with their pain relief and live with pain. Meeting patients'  
 280 expectations will undoubtedly result in increased patient satisfaction with care. The challenge  
 281 was to extract genuine expectations and needs from individuals. Table 3 lists the meaning units,  
 282 codes, and categories for Theme 2: Expectations and needs.

283 **Table 3. Theme 2: Expectations and needs**

| Meaning units                                                                                                                          | Condensed meaning units                                                              | Codes                                                       | Categories                      | Themes                        |
|----------------------------------------------------------------------------------------------------------------------------------------|--------------------------------------------------------------------------------------|-------------------------------------------------------------|---------------------------------|-------------------------------|
| <i>"The only thing I want is to be free of pain. Nothing else is needed. It does not matter even if dying from cancer"</i>             | Most of them need to live without pain, which bothers them more than cancer.         | Need to live without pain                                   | <b>Pain-free life</b>           | <b>Expectations and needs</b> |
| <i>"God is the one who gave me this pain. I am always telling God... Please get this back."</i>                                        | They believe that it is God who has given this pain and expects God to relieve pain. | The spiritual belief that God has the power to relieve pain |                                 |                               |
| <i>"I do not want billions from somewhere ..... I want to go out as before... That is all..."</i>                                      | To live a life without a burden on the others                                        | Need to be independent                                      | <b>Spend a normal lifestyle</b> |                               |
| <i>"We do not have a bathroom inside, and Now my wife also cannot take me. If I have a wheelchair, it is easy for me to go out..."</i> | Need for physical aids to ease daily living                                          |                                                             |                                 |                               |



|                                                                                                          |                                                            |                                                      |                                   |  |
|----------------------------------------------------------------------------------------------------------|------------------------------------------------------------|------------------------------------------------------|-----------------------------------|--|
| <p><i>"I need someone to be with me. There is no one to give me anything even to eat and drink."</i></p> | <p>Need somebody to help in self-caring</p>                | <p>Dependency on others fulfilling personal care</p> | <p><b>Need of a caregiver</b></p> |  |
| <p><i>"I am talking to this one [bystander]. I forget all the mental problems in my head...."</i></p>    | <p>Need somebody to talk to distract from mental agony</p> | <p>needs, security, and communication needs</p>      |                                   |  |

284

285

### 286 **3.2.1 Need for a caregiver**

287 Many patients felt that the primary caregiver's job is vital. When a housewife got sick, the other  
 288 household members had to care for the patient and the housework. Thus, some of them could  
 289 not continue in their usual jobs.

290 *"Mostly, I am alone at home. So, most of the time, there is no one to talk to. My wife*  
 291 *looks after me 500% at home... but she cannot lift me. She is not strong enough to lift*  
 292 *me. She is somewhat old now too.... she has lots of other household work to do as*  
 293 *well...." (P-02)*

### 294 **3.2.2 Spend a normal lifestyle**

295 Participants expressed a desire to 'live normally' and attend to 'daily duties,' such as domestic  
 296 chores, hobbies, and maintaining relationships with family and friends. These requests  
 297 emphasized how pain was affecting them functionally, their ability to perform tasks, and in  
 298 attending to their needs rather than their general health and function. All participants noted the  
 299 importance of having control of their lives to ensure independent status without burdening the  
 300 next of kin. Most participants explained what they had lost of their former selves. Participants  
 301 described the need for a 'pain-free status', enabling them to resume their former lives. Many

302 reported how their lives and everyday activities were kept on pause until pain relief was  
303 obtained and how they had lost pieces of their previous selves as a result of the pain.

304 *"Feeling we have stopped at the same place in our lives these days ... because of this*  
305 *pain and disease... All the plans were stuck for a while. The essential thing is a full*  
306 *recovery." (P-19)*

### 307 **3.2.3 Pain-free life**

308 Participants expressed their need for mental and physical well-being with satisfactory pain  
309 relief. They expect it to happen either by completely curing the disease, providing satisfactory  
310 pain relief or through spiritual means. A significant finding was that participants preferred to  
311 present themselves as patients with cancer rather than dying from pain.

312 *"The only thing I need is to live without pain... Nothing else is needed... It does not*  
313 *matter if I am dying of cancer ... I know that I have to die at some point... What I want*  
314 *is to die without being in pain." (P-13)*

315 *"I have everything... I do not want anything. I do not have the temptation on anything.*  
316 *No value of anything to me... I want an immediate cure and get rid of this pain." (P-*  
317 *05)*

## 318 **04. Discussion**

319 Experiencing pain on top of cancer is overwhelming to the patient and the family. While pain  
320 management has been designated a priority for cancer patients, to our knowledge, no research  
321 has examined the concerns and needs of cancer patients in Sri Lanka.

322 An in-depth study into the needs and concerns of cancer patients may shed light on designing  
323 ways to address those requirements and improve pain outcomes. This study provided 21 cancer  
324 patients with a voice to discuss their experiences with illness and pain, deepening our

325 understanding. The interview transcripts highlighted a lifestyle change and expectations/needs.  
326 The findings reflect how previous life experiences were embedded and interlaced with pain  
327 and participants' daily activities.

328 The current study used a qualitative approach to explore patients' needs and problems because  
329 it was the best way to understand patients' perspectives and establish an understanding based  
330 on their reported problems and needs. Care was taken to include categories of patients who  
331 could give more variability to the understanding. Interviews were conducted according to  
332 protocol until theoretical saturation was reached. To ensure data consistency and reliability, the  
333 same investigator conducted all interviews. These are not just pain-related statistics. The  
334 diagnosis of cancer dramatically influences many aspects of quality of life. Thus, the facts  
335 mentioned are interconnected. The patients communicated in Sinhalese, and the PI translated  
336 their comments into English. While translation might dilute meaning, most of what is described  
337 is comparable to what is documented in numerous studies on cancer pain conducted in multiple  
338 languages.

339 A major theme of this current study was changing normal lifestyles in terms of physical, social,  
340 and psychological elements. The impact of cancer pain on daily life and activities was  
341 repeatedly mentioned. However, similar losses were also addressed in relation to cancer, its  
342 treatment (chemotherapy), and cancer-related symptoms such as weakness and fatigue [18-19].

343 A complicated factor was the existence of comorbidities, which contributed to the loss of  
344 function. A recent Chinese study found "functional constraints" as a major theme and "daily  
345 living activities," "social communication," and "work" as sub-themes, similar to ours [19].

346 The current study participants' well-being was affected by their inability to undertake "normal"  
347 activities like shopping, walking in the garden, or socializing. The cancer literature shows that  
348 pain hinders independence and daily activities [20]. Social rejection, sadness, and loss of self  
349 were described by some cancer patients who lost mobility. They valued family and societal  
350 duties and felt less worthwhile without them. However, patients worry about being seen as a

351 burden to their families, not only because of the disease's costs but also because of the care  
352 they receive, which impacts perception and powerlessness. A hospice study in the US found a  
353 sense of helplessness regarding pain [21]. Duggleby (2000) found pain adaptation difficult in  
354 11 participants, 65-year-olds. The pain increased their powerlessness and sorrow [22]. Thome  
355 and colleagues found that cancer pain was linked to death and dying fears in ten Swedish older  
356 adults [23]. Other research found similar worries about pain, illness progression, and pain  
357 treatments [23-24].

358 Participants in the current study ranked 'living a pain-free life,' "returning to a normal lifestyle,"  
359 and 'need for a caregiver' as their most essential expectations and needs. Survival and pain  
360 alleviation were the primary concerns of the participants. Analgesia was the primary concern.  
361 The people who participated in the study said pain control was necessary for their well-being.  
362 Xu and colleagues [19] reported pain relief as a top priority among 12 participants with cancer  
363 pain in China.

364 Patients resort to religion/spirituality for hope, confidence, and health. Research shows that  
365 religion and palliative care are generally beneficial. Religion and spirituality reduce stress and  
366 sadness and improve quality of life [22]. Spiritual care helps patients have hope (88%) and  
367 comfort (83%), according to research in Spain. According to the survey, 92.5% of respondents  
368 believe spiritual emphasis is vital during this time since it enhances the quality of life and the  
369 process of facing death [25]. Participants in Brockopp et al.'s [24] study acknowledged the  
370 importance of a supportive relationship with their caregivers.

371 One study examined patients' descriptions of a day when they thought their pain was  
372 'adequately managed,' including interviewing 15 people with metastatic disease [26]. The study  
373 identified aspects that patients believe are critical for an 'acceptable day,' such as engaging in  
374 meaningful activities, relieving pain, and feeling well enough to socialize. McPherson and  
375 colleagues[27] found that several participants hesitated to discuss their pain with doctors or

376 family members. Participants in this study expressed their desire for independence, including  
377 adaptation and dependency, pain, exhaustion, daily routines, sadness, and loss. Cancer reduces  
378 their freedom substantially. Mobility, domestic tasks, personal care, and social and recreational  
379 activities were described as realistic or under control. Patients sought normalcy through caring  
380 for or being with family.

381 The validity and reliability of research are directly related to the quality or trustworthiness of  
382 the results. In the context of this study, four strategies were used to enhance the study's  
383 trustworthiness. These strategies involve triangulation, engaging participants, providing  
384 detailed descriptions, and working in the field for an extended period. While qualitative  
385 research does not seek to generalize findings to a larger population, it usually offers sufficient  
386 descriptive detail to enable the reader to assess whether the findings apply in other contexts.  
387 Given that saturation was achieved across a broad population, it is reasonable to assume that  
388 the findings apply to cancer patients treated in a similar setting.

389 Going beyond the traditional approaches, assessment of pain experience can be supplemented  
390 with an in-depth evaluation of the 'needs' and 'concerns' of cancer patients by a  
391 multidisciplinary team of experts. Thus, individualized pain management protocols can be  
392 devised by giving due recognition to the salient findings. Further research is recommended to  
393 study the effectiveness of such individualized pain protocols in achieving better pain outcomes.

## 394 **5. Conclusion**

395 Our study's findings indicate a variety of concerns and needs of patients experiencing cancer  
396 pain, which may not be addressed during a typical pain session. 'Pain-free' living was identified  
397 as the most essential need of patients with cancer pain, while 'change in normal lifestyle' due  
398 to adverse impact on 'bio-psycho-social-spiritual wellbeing' was recognized as the most  
399 pressing concern.

## 400 **Acknowledgments**

401 The authors, with great respect, appreciate the cooperation extended by the staff of Apeksha  
402 Hospital, Maharagama, Sri Lanka, and all the study participants.

403

## 404 **References**

405 1. Ferlay J, Ervik M, Lam F, et al. Global Cancer Observatory: Cancer Today. Lyon, France:  
406 International Agency for Research on Cancer; 2020 Available from:  
407 <https://gco.iarc.fr/today>, accessed on 25.02.2022.

408 2. Sung H, Ferlay J, Siegel RL, et al. Global Cancer Statistics 2020: GLOBOCAN Estimates  
409 of Incidence and Mortality Worldwide for 36 Cancers in 185 Countries. *CA Cancer J Clin.*  
410 2021;71(3):209-249. doi:10.3322/caac.21660

411 3. Van den Beuken-van Everdingen MH, Hochstenbach LM, Joosten EA, et al. Update on  
412 Prevalence of Pain in Patients With Cancer: Systematic Review and Meta-Analysis. *J Pain*  
413 *Symptom Manage.* 2016;51(6):1070-1090.e9. doi:10.1016/j.jpainsymman.2015.12.340

414 4. Naughton MJ, Weaver KE. Physical and mental health among cancer survivors:  
415 considerations for long-term care and quality of life. *N C Med J.* 2014;75(4):283-286.  
416 doi:10.18043/ncm.75.4.283

417 5. Javier FO, Irawan C, Mansor MB, et al. Cancer Pain Management Insights and Reality in  
418 Southeast Asia: Expert Perspectives From Six Countries. *J Glob Oncol.* 2016;2(4):235-  
419 243. Published 2016 Apr 13. doi:10.1200/JGO.2015.001859

420 6. Li, Zhang et al. "Burden of cancer pain in developing countries: a narrative literature  
421 review." *ClinicoEconomics and outcomes research: CEOR* vol. 10 675-691. 2 Nov. 2018,  
422 doi:10.2147/CEOR.S181192

423 7. Wells N, Pasero C, McCaffery M. Improving the Quality of Care Through Pain  
424 Assessment and Management. In: Hughes RG, editor. *Patient Safety and Quality: An*

- 425 Evidence-Based Handbook for Nurses. Rockville (MD): Agency for Healthcare Research  
426 and Quality (US); 2008 Apr. Chapter 17. Available from:  
427 <https://www.ncbi.nlm.nih.gov/books/NBK2658/>
- 428 8. Holtan A, Aass N, Nordøy T, et al. Prevalence of pain in hospitalised cancer patients in  
429 Norway: a national survey. *Palliat Med.* 2007;21(1):7-13.  
430 doi:10.1177/0269216306073127
- 431 9. Deng, D., Fu, L., Zhao, Y. X., Wu, X., Zhang, G., Liang, C., Xie, C. H., & Zhou, Y. F.  
432 (2012). The Relationship Between Cancer Pain and Quality of Life in Patients Newly  
433 Admitted to Wuhan Hospice Center of China. *American Journal of Hospice and Palliative*  
434 *Medicine*, 29(1), 53–59. <https://doi.org/10.1177/1049909111418636>
- 435 10. He, Q.H., Liu, Q.L, Li, Z, Li, K.Z, Xie, Y.G. (2015). Impact of epidural analgesia on  
436 quality of life and pain in advanced cancer patients. *Pain Management*  
437 *Nursing.*;16(3):307–313.
- 438 11. Ovayolu, N., Ovayolu ,Ö., Serçe, S., Tuna, D., Pirbudak, Çöçelli, L., Sevinç, A., (2013).  
439 Pain and quality of life in Turkish cancer patients. *Nursing & Health Sciences.*;15(4):437–  
440 443.
- 441 12. Oliveira, K.G., von Zeidler, S.V., Podestá, J.R. et al. (2014). Influence of pain severity on  
442 the quality of life in patients with head and neck cancer before antineoplastic therapy.  
443 *BMC Cancer*. 14, 39 <https://doi.org/10.1186/1471-2407-14-39>
- 444 13. Kwon, J. H., Oh, S. Y., Chisholm, G., Lee, J. A., Lee, J. J., Park, K. W., Nam, S. H., Song,  
445 H. H., Lee, K., Zang, D. Y., Kim, H. Y., Choi, D. R., Kim, H. J., Kim, J. H., Jung, J. Y.,  
446 Jang, G., Kim, H. S., Won, J. Y., & Bruera, E. (2013). Predictors of high score patient-  
447 reported barriers to controlling cancer pain: a preliminary report. *Supportive care in cancer*  
448 : official journal of the Multinational Association of Supportive Care in Cancer, 21(4),  
449 1175–1183. <https://doi.org/10.1007/s00520-012-1646-x>

- 450 14. Breivik, H., Cherny, N., Collett, B., de Conno, F., Filbet, M., Foubert, A. J., Cohen, R., &  
451 Dow, L. (2009). Cancer-related pain: A pan-European survey of prevalence, treatment,  
452 and patient attitudes. *Annals of Oncology*, 20(8), 1420–1433.  
453 <https://doi.org/10.1093/annonc/mdp001>
- 454 15. Fillingim, Roger B. “Individual differences in pain: understanding the mosaic that makes  
455 pain personal.” *Pain* vol. 158 Suppl 1,Suppl 1 (2017): S11-S18.  
456 doi:10.1097/j.pain.0000000000000775
- 457 16. Graneheim UH, Lundman B. Qualitative content analysis in nursing research: concepts,  
458 procedures and measures to achieve trustworthiness. *Nurse Education Today*.  
459 2004;24(2):105-112. doi:[10.1016/j.nedt.2003.10.001](https://doi.org/10.1016/j.nedt.2003.10.001)
- 460 17. Guba EG, Lincoln YS. *Effective Evaluation*. 1st ed. Jossey-Bass Publishers; 1981.
- 461 18. McPherson CJ, Hadjistavropoulos T, Devereaux A, et al. A qualitative investigation of the  
462 roles and perspectives of older patients with advanced cancer and their family caregivers  
463 in managing pain in the home. *BMC Palliat Care*. 2014;13:39. Published 2014 Aug 8.  
464 doi:10.1186/1472-684X-13-39
- 465 19. Xu X, Cheng Q, Ou M, et al. Pain acceptance in cancer patients with chronic pain in  
466 Hunan, China: A qualitative study. *International Journal of Nursing Sciences*.  
467 2019;6(4):385-391. doi:[10.1016/j.ijnss.2019.09.011](https://doi.org/10.1016/j.ijnss.2019.09.011)
- 468 20. Bowling A, Dieppe P. What is successful ageing and who should define it?. *BMJ*.  
469 2005;331(7531):1548-1551. doi:10.1136/bmj.331.7531.1548
- 470 21. Duggleby W. Enduring suffering: a grounded theory analysis of the pain experience of  
471 elderly hospice patients with cancer. *Oncol Nurs Forum*. 2000;27(5):825-831.
- 472 22. Hackett J, Godfrey M, Bennett MI. Patient and caregiver perspectives on managing pain  
473 in advanced cancer: A qualitative longitudinal study. *Palliat Med*. 2016;30(8):711-719.  
474 doi:[10.1177/0269216316628407](https://doi.org/10.1177/0269216316628407)



- 475 23. Thomé B, Esbensen BA, Dykes AK, et al. The meaning of having to live with cancer in  
476 old age. *Eur J Cancer Care (Engl)*. 2004;13(5):399-408. doi:10.1111/j.1365-  
477 2354.2004.00542.x
- 478 24. Brockopp DY, Warden S, Colclough G, et al. Elderly hospice patients' perspective on pain  
479 management. *Hosp J*. 1996;11(3):41-53. doi:10.1080/0742-969x.1996.11882826
- 480 25. Bermejo Higuera JC, Lozano González B, Villacieros Durbán M, et al. Spiritual needs in  
481 palliative care. Users assessment and experience. *Medicina Paliativa*. 2013;20(3):93-102.  
482 doi:[10.1016/j.medipa.2012.05.004](https://doi.org/10.1016/j.medipa.2012.05.004)
- 483 26. Zelman DC, Smith MY, Hoffman D, et al. Acceptable, manageable, and tolerable days:  
484 daily patient goals for medication management of persistent pain. *Journal of Pain and*  
485 *Symptom Management*. 2004;28(5):474-487. doi:[10.1016/j.jpainsymman.2004.02.022](https://doi.org/10.1016/j.jpainsymman.2004.02.022)
- 486 27. McPherson CJ, Hadjistavropoulos T, Devereaux A, et al. A qualitative investigation of the  
487 roles and perspectives of older patients with advanced cancer and their family caregivers  
488 in managing pain in the home. *BMC Palliat Care*. 2014;13:39. Published 2014 Aug 8.  
489 doi:10.1186/1472-684X-13-39
